# Supplementary material
Source: Springer Nature journal article supplement (https://www.springermedizin.de/resource/supplementary/12882_2014_860_MOESM2_ESM.pdf/9454468)
Supplement: MOESM2 [file 9454468]

### Plate A: Patients' purchase

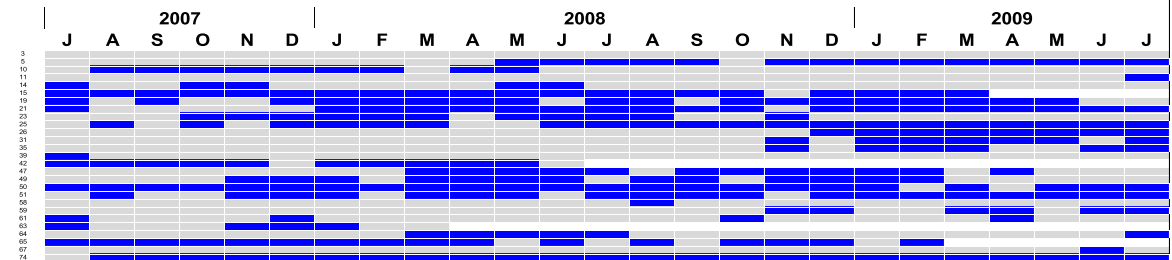

### Plate B: Documentation by nurses

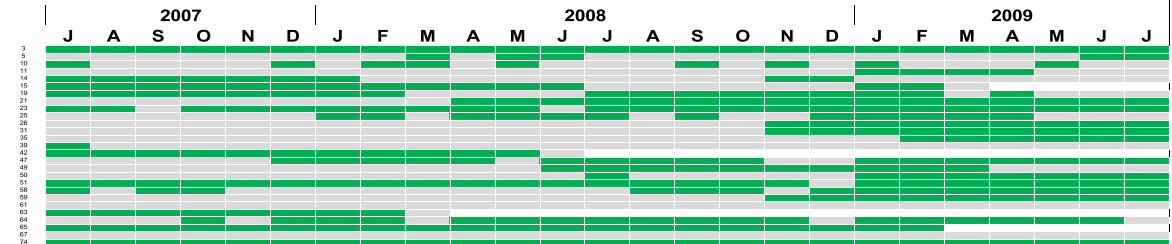

### Plate C: Adherence

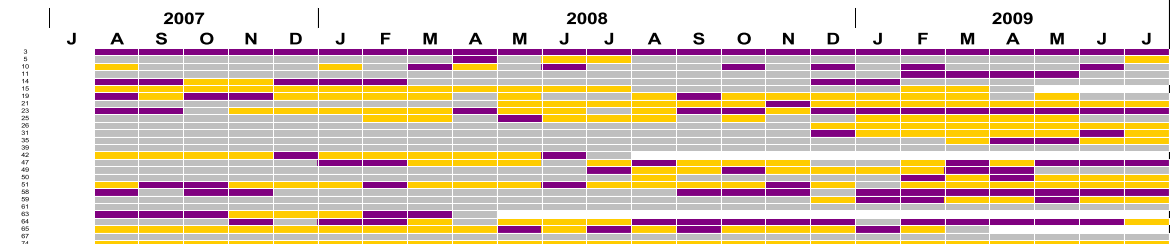

### Plate D: Relationship between nurses' documentation and patient purchase

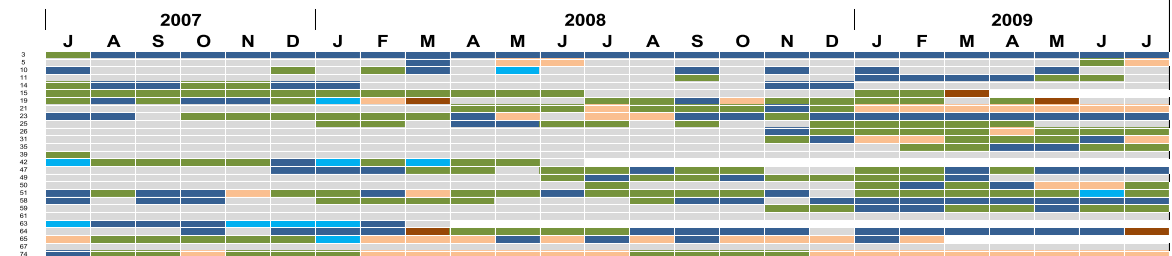

### Color coding

|            | Color coding                                                                                   |
|------------|------------------------------------------------------------------------------------------------|
| All plates | Deceased                                                                                       |
| Plate A    | Patient purchased drug                                                                         |
|            | Drug not purchased                                                                             |
| Plate B    | Documentation in nurse's report                                                                |
|            | The drug was not mentioned in the nurse's monthly report                                       |
| plate C    | Compliance                                                                                     |
|            | Non compliance                                                                                 |
| Plate D    | Nurse documentation is the same as patient purchased.                                          |
|            | Nurse reported a lower dose than the patient purchased.                                        |
|            | Nurse documented that the patient does not use the drug, when he was in fact it was purchased. |
|            | Nurse documented that the patient uses more of the drug than purchased.                        |
|            | Nurse documented use of a drug the patient did not purchase.                                   |
